# Supplementary material
Source: PubMed Central journal article supplement (PMC1243799)
Supplement: nar_33_17_5553__1.pdf [file nar_33_17_5553__1.pdf]

**Supplemental Information**  
**for**  
**UVA-visible photo-excitation of guanine radical cations**  
**produces sugar radicals in DNA and model structures**

By

Amitava Adhikary<sup>a</sup>, Aramice Y. S. Malkhasian, Sean Collins, Jessica Koppen, David  
Becker and Michael D. Sevilla\*

Department of Chemistry  
Oakland University  
Rochester, MI 38309

<sup>a</sup>On leave from Department of Chemistry, Rajdhani College, University of Delhi, Raja  
Garden, Delhi – 110 015, India.

**Supplementary Material:**

**Figure S1**

**Figure S2**

**Table S1**

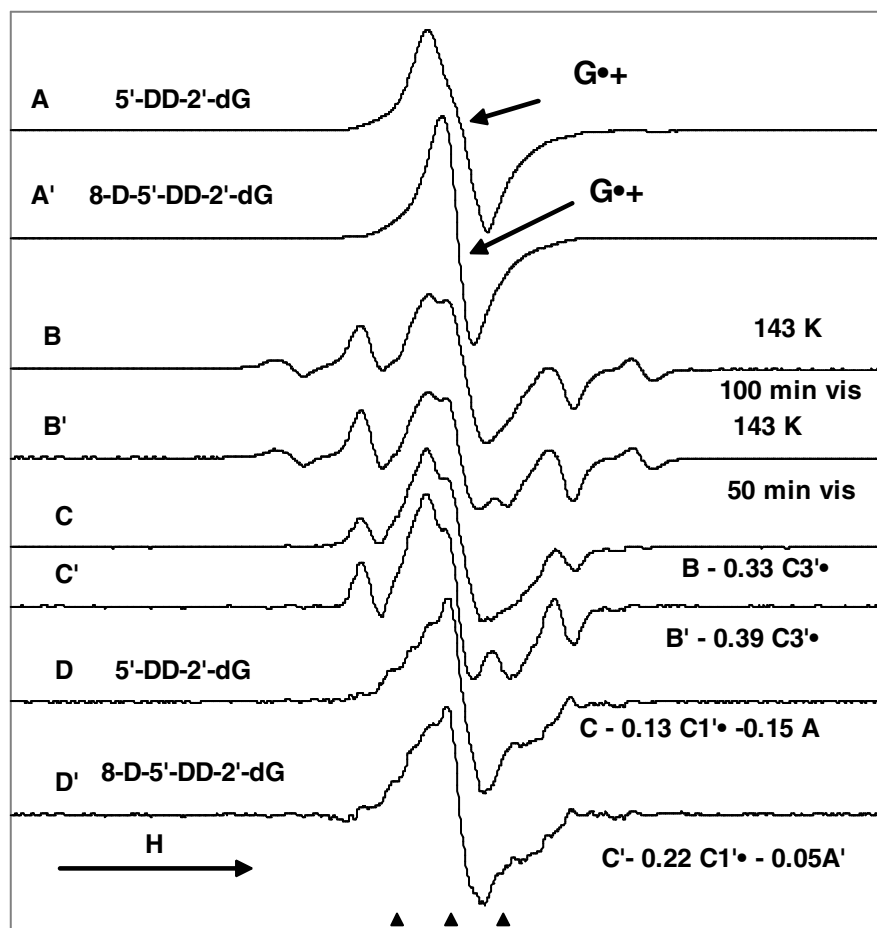

**Figure S1.** (A) and (A') represent the spectrum of  $G^{\bullet+}$  formed in 5'-DD-2dG and 8-D-5'-DD-2'-dG respectively before illumination at 77 K in the presence of 5 mg  $K_2S_2O_8$  in  $D_2O$  in 7 M LiCl glass which was  $\gamma$ -irradiated at 77K for 105 min followed by annealing at 150 K. (B) and (B') After visible illumination at 143 K, showing a nearly complete conversion to sugar radicals. (C) and (C') show the subtraction of  $C3^{\bullet}$  (benchmark) in Figure 1C from B and B' respectively. (D) and (D') show that the 5'-DD-2dG and 8-D-5'-DD-2'-dG produce almost identical spectra after the requisite amount of subtraction of  $C1^{\bullet}$  (benchmark) in Figure 1A and  $G^{\bullet+}$ . All ESR spectra are recorded at 77 K. The sample in A and A' has a red-violet color; those in B and B' were colorless.

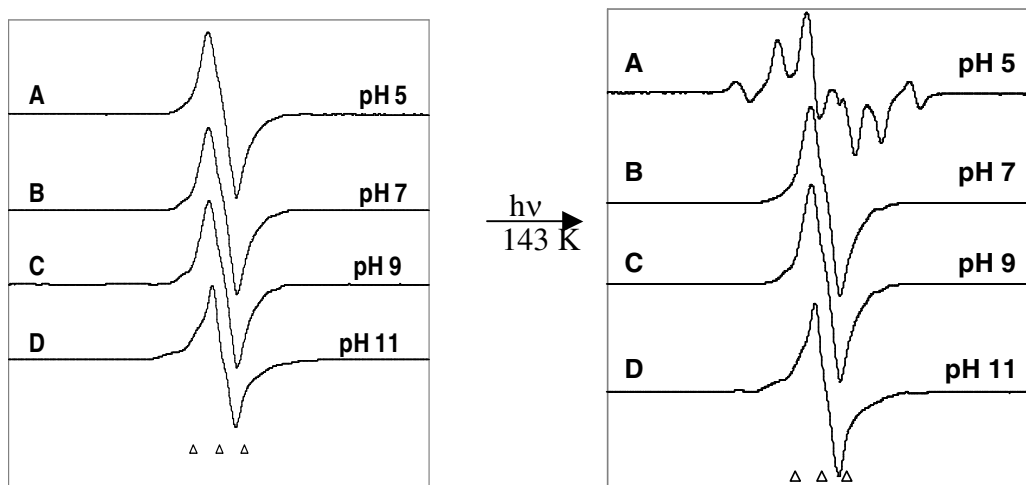

**Figure S2.** 2'-dG (3 mg) in the presence of 5 mg  $K_2S_2O_8$  in  $D_2O$  in 7 M LiCl glass which was  $\gamma$ -irradiated at 77K for 105 min followed by annealing at 150K to produce  $G\bullet^+$ . The pH was adjusted by adding appropriate amounts of 1 M NaOH in  $D_2O$ .

The left hand spectra show the spectra from  $G\bullet^+$  after irradiation and annealing. The right hand spectra show the same samples after illumination with visible light for 100 minutes (for spectrum A) with no filter present and this spectrum is same as that of Figure 5B. Substantial changes were noted even after 15 min of irradiation. For spectra B, C and D, all samples were illuminated for 30 min and as no significant changes were found, thus these spectra were taken only after 30 min of illumination. All spectra are recorded at 77 K.

**Table S1****TD-DFT 6-311++G(d,p) Calculation for 2'deoxyguanosine  
(Structure Optimized at DFT B3LYP 6-31G(d))****Method: TD-DFT****Basis Set: 6-311++G(d,p)****Functionals: B3LYP****Transitions: 16****Total Energy: -963.518542789 Hartrees**

| <b>Excited State</b> | <b>1</b> | <b>Energy (eV)</b>                                                | <b>Wavelength (nm)</b> | <b>Oscillator Strength</b> |
|----------------------|----------|-------------------------------------------------------------------|------------------------|----------------------------|
|                      |          | 1.4548                                                            | 852.22                 | f=0.0009                   |
| 68B->70B             | 0.817    | (1 particle RhoCI Excited state density for  0.2  and above only) |                        |                            |
| 69B->70B             | -0.557   |                                                                   |                        |                            |
| <b>Excited State</b> | <b>2</b> | 1.6482                                                            | 752.22                 | f=0.0004                   |
| 66B->70B             | -0.393   |                                                                   |                        |                            |
| 68B->70B             | 0.506    |                                                                   |                        |                            |
| 69B->70B             | 0.758    |                                                                   |                        |                            |
| <b>Excited State</b> | <b>3</b> | 1.7449                                                            | 710.54                 | f=0.0002                   |
| 66B->70B             | 0.899    |                                                                   |                        |                            |
| 68B->70B             | 0.212    |                                                                   |                        |                            |
| 69B->70B             | 0.329    |                                                                   |                        |                            |
| <b>Excited State</b> | <b>4</b> | 1.9371                                                            | 640.04                 | f=0.0000                   |
| 65B->70B             | 0.229    |                                                                   |                        |                            |
| 67B->70B             | 0.940    |                                                                   |                        |                            |
| <b>Excited State</b> | <b>5</b> | 1.9371                                                            | 640.04                 | f=0.0000                   |
| 64B->70B             | -0.618   |                                                                   |                        |                            |
| 65B->70B             | 0.721    |                                                                   |                        |                            |
| 67B->70B             | -0.295   |                                                                   |                        |                            |
| <b>Excited State</b> | <b>6</b> | 2.5328                                                            | 489.51                 | f=0.0067                   |
| 62B->70B             | -0.361   |                                                                   |                        |                            |
| 63B->70B             | 0.749    |                                                                   |                        |                            |
| 64B->70B             | -0.384   |                                                                   |                        |                            |
| 65B->70B             | -0.311   |                                                                   |                        |                            |
| <b>Excited State</b> | <b>7</b> | 2.7877                                                            | 444.76                 | f=0.0126                   |
| 62B->70B             | 0.883    |                                                                   |                        |                            |
| 63B->70B             | 0.402    |                                                                   |                        |                            |
| <b>Excited State</b> | <b>8</b> | 2.9823                                                            | 415.73                 | f=0.0001                   |

62B->70B -0.208  
63B->70B 0.450  
64B->70B 0.646  
65B->70B 0.558

**Excited State 9** 3.3623 368.75 f=0.0340  
58B->70B 0.593  
59B->70B 0.484  
60B->70B 0.207  
61B->70B -0.552

**Excited State 10** 3.4021 364.44 f=0.0506  
70B->71B -0.227  
58B->70B -0.515  
59B->70B 0.522  
60B->70B 0.198

**Excited State 11** 3.6703 337.80 f=0.0009  
58B->70B 0.420  
59B->70B 0.401  
60B->70B -0.257  
61B->70B 0.744

**Excited State 12** 3.7085 334.32 f=0.0014  
58B->70B 0.407  
59B->70B -0.460  
60B->70B 0.724  
61B->70B 0.285

Excited State 13 4.3669 283.92 f=0.1249  
70B->71B -0.623  
70B->72B 0.655  
52B->70B -0.217

Excited State 14 4.4047 281.48 f=0.1282  
70B->71B 0.650  
70B->72B 0.669

Excited State 15 4.6126 268.79 f=0.0018  
57B->70B 0.987

Excited State 16 4.8881 253.65 f=0.0012  
68B->71B -0.306  
69B->71B 0.206  
56B->70B 0.850
